# Supplementary material
Source: PubMed Central journal article supplement (PMC10247223)
Supplement: NIHMS1898260-supplement-1.pdf [file NIHMS1898260-supplement-1.pdf]

## SUPPLEMENTAL MATERIAL

**Table S1.** Association between drinking water nitrate and incident colon and rectal cancers, by TTHM level, Iowa Women's Health Study participants >10 years at their drinking water source.

|                           | TTHM < median (<4.59 µg/L) |                   |                          | TTHM ≥ median (≥ 4.59 µg/L) |                          | P-heterogeneity |
|---------------------------|----------------------------|-------------------|--------------------------|-----------------------------|--------------------------|-----------------|
|                           | NO <sub>3</sub> -N         | Cases             | HR <sup>a</sup> , 95% CI | Cases                       | HR <sup>a</sup> , 95% CI |                 |
| <b>Colon<sup>a</sup></b>  | ≤0.36                      | 97                | 1.00 (Ref.)              | 24                          | 0.67 (0.42, 1.08)        | 0.96            |
|                           | 0.37-0.80                  | 80                | 0.96 (0.71, 1.30)        | 48                          | 1.21 (0.86, 1.72)        |                 |
|                           | 0.81-1.35                  | 27                | 0.90 (0.58, 1.40)        | 121                         | 1.32 (1.01, 1.72)        |                 |
|                           | 1.36-3.51                  | 72                | 0.95 (0.70, 1.29)        | 46                          | 0.84 (0.59, 1.20)        |                 |
|                           | >3.51                      | 31                | 0.84 (0.56, 1.26)        | 78                          | 0.92 (0.68, 1.24)        |                 |
| <b>Rectum<sup>b</sup></b> | NO <sub>3</sub> -N         |                   |                          |                             |                          | 0.77            |
|                           | ≤0.36                      | 26                | 1.00 (Ref.)              | 14                          | 1.74 (0.90, 3.35)        |                 |
|                           | 0.37-0.80                  | 9                 | 0.43 (0.20, 0.91)        | 9                           | 0.89 (0.42, 1.91)        |                 |
|                           | 0.81-1.35                  | 11                | 1.42 (0.68, 2.94)        | 25                          | 1.03 (0.59, 1.80)        |                 |
|                           | 1.36-3.51                  | 17                | 0.88 (0.47, 1.63)        | 22                          | 1.60 (0.90, 2.84)        |                 |
| >3.51                     | 5                          | 0.53 (0.20, 1.38) | 20                       | 0.89 (0.49, 1.62)           |                          |                 |

<sup>a</sup>Models adjusted for age, smoking status, and physical activity.
